# Supplementary material
Source: Springer Nature journal article supplement (https://www.springermedizin.de/resource/supplementary/12916_2010_307_MOESM3_ESM.pdf/9599600)

## Percentage Donors in Each Decade vs. Knee Cartilage Grade

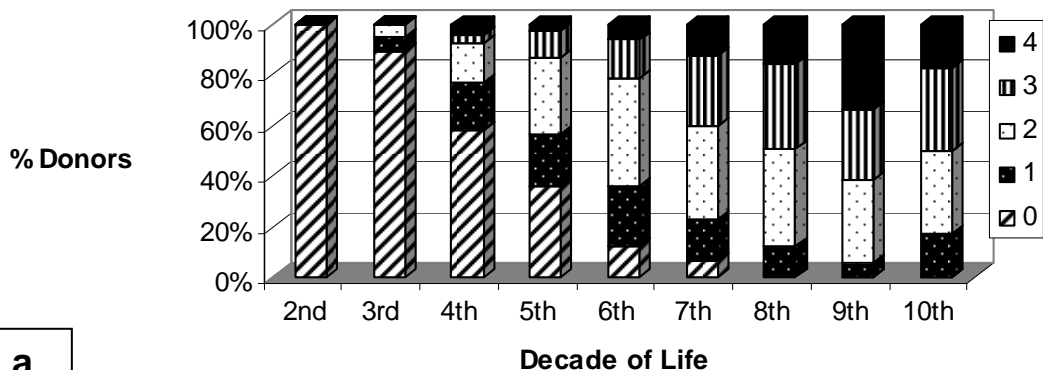

## Percentage Donors in Each Decade vs. Ankle Cartilage Grade

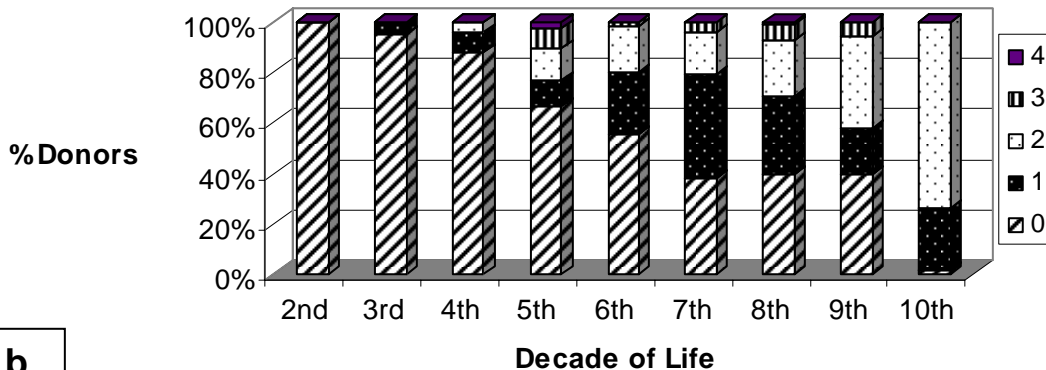

Supplement: MOESM3 [file 9599600]
